# Supplementary material for: Influence of Marination with Aromatic Herbs and Cold Pressed Oils on Black Angus Beef Meat
Source: MDPI journal article supplement (doi:10.3390/foods10092012), 2021-08-27
Supplement: s1 [file s1]

Table S1:Marinated sirloin recipes

| Marinade ingredients | UM    | Marinade 1<br>(M <sub>1</sub> ) control | Marinade<br>2 (M <sub>2</sub> ) | Marinade<br>3 (M <sub>3</sub> ) | Marinade<br>4 (M <sub>4</sub> ) | Marinade<br>5 (M <sub>5</sub> ) | Marinade<br>6 (M <sub>6</sub> ) |
|----------------------|-------|-----------------------------------------|---------------------------------|---------------------------------|---------------------------------|---------------------------------|---------------------------------|
| Rosemary             | kg/kg |                                         | 0.014                           |                                 |                                 |                                 |                                 |
| Olive oil            | L/kg  |                                         | 0.048                           |                                 |                                 |                                 |                                 |
| Oregano              | kg/kg |                                         |                                 | 0.014                           |                                 |                                 |                                 |
| Pumpkin oil          | L/kg  |                                         |                                 | 0.048                           |                                 |                                 |                                 |
| Thyme                | kg/kg |                                         |                                 |                                 | 0.014                           |                                 |                                 |
| Sunflower oil        | L/kg  |                                         |                                 |                                 | 0.048                           |                                 |                                 |
| Basil                | kg/kg |                                         |                                 |                                 |                                 | 0.014                           |                                 |
| Walnut oil           | L/kg  |                                         |                                 |                                 |                                 | 0.048                           |                                 |
| Ginger               | kg/kg |                                         |                                 |                                 |                                 |                                 | 0.014                           |
| Sesame oil           | L/kg  |                                         |                                 |                                 |                                 |                                 | 0.048                           |
| Salt                 | %     | 2                                       | 2                               | 2                               | 2                               | 2                               | 2                               |
| Black ground pepper  | %     | 0.50                                    | 0.50                            | 0.50                            | 0.50                            | 0.50                            | 0.50                            |

Table S2: Phenolics profile of marinated samples

| Compound              | M <sub>1</sub><br>24h   | M <sub>1</sub><br>72h    | M <sub>1</sub><br>120h  | M <sub>2</sub><br>24h    | M <sub>2</sub><br>72h    | M <sub>2</sub><br>120h   | M <sub>3</sub><br>24h    | M <sub>3</sub><br>72h    | M <sub>3</sub><br>120h  | M <sub>4</sub><br>24h    | M <sub>4</sub><br>72h    | M <sub>4</sub><br>120h                 | M <sub>5</sub><br>24h    | M <sub>5</sub><br>72h    | M <sub>6</sub><br>120h    | M <sub>6</sub><br>24h    | M <sub>6</sub><br>72h    | M <sub>6</sub><br>120h   |
|-----------------------|-------------------------|--------------------------|-------------------------|--------------------------|--------------------------|--------------------------|--------------------------|--------------------------|-------------------------|--------------------------|--------------------------|----------------------------------------|--------------------------|--------------------------|---------------------------|--------------------------|--------------------------|--------------------------|
| Flavones              |                         |                          |                         |                          |                          |                          |                          |                          |                         |                          |                          |                                        |                          |                          |                           |                          |                          |                          |
| HLG                   | n.d                     | n.d                      | n.d                     | 21.20±0.23 <sup>a</sup>  | 21.33±0.45 <sup>a</sup>  | 21.45±0.78 <sup>a</sup>  | n.d                      | n.d                      | n.d                     | n.d                      | n.d                      | n.d                                    | n.d                      | n.d                      | n.d                       | n.d                      | n.d                      | n.d                      |
| NP                    | n.d                     | n.d                      | n.d                     | 48.18±0.88 <sup>c</sup>  | 35.23±0.33 <sup>b</sup>  | 20.47±0.67 <sup>a</sup>  | n.d                      | n.d                      | n.d                     | n.d                      | n.d                      | n.d                                    | n.d                      | n.d                      | n.d                       | n.d                      | n.d                      | n.d                      |
| LG                    | n.d                     | n.d                      | n.d                     | n.d                      | n.d                      | n.d                      | 30.93±0.4 <sup>ab</sup>  | 29.03±0.33 <sup>a</sup>  | 29.01±0.7 <sup>a</sup>  | 30.05±0.8 <sup>ab</sup>  | 29.09±0.77 <sup>a</sup>  | 29.04±0.37 <sup>a</sup>                | n.d                      | n.d                      | n.d                       | n.d                      | n.d                      | n.d                      |
| PL                    | n.d                     | n.d                      | n.d                     | 30.64±0.78 <sup>b</sup>  | 29.32±0.44 <sup>ab</sup> | 28.46±0.88 <sup>a</sup>  | n.d                      | n.d                      | n.d                     | n.d                      | n.d                      | n.d                                    | n.d                      | n.d                      | n.d                       | n.d                      | n.d                      | n.d                      |
| LAG                   | n.d                     | n.d                      | n.d                     | 23.26±0.99 <sup>c</sup>  | 22.27±0.77 <sup>ab</sup> | 21.99±0.85 <sup>a</sup>  | n.d                      | n.d                      | n.d                     | n.d                      | n.d                      | n.d                                    | n.d                      | n.d                      | n.d                       | n.d                      | n.d                      | n.d                      |
| LA                    | n.d                     | n.d                      | n.d                     | n.d                      | n.d                      | n.d                      | 4.99±0.77 <sup>a</sup>   | 4.56±0.99 <sup>a</sup>   | 5.10±0.89 <sup>a</sup>  | 15.73±0.88 <sup>b</sup>  | 14.22±0.76 <sup>a</sup>  | 15.05 ±0.98 <sup>ab</sup>              | n.d                      | n.d                      | n.d                       | n.d                      | n.d                      | n.d                      |
| CRM                   | n.d                     | n.d                      | n.d                     | 59.61±0.89 <sup>c</sup>  | 53.76±1.23 <sup>b</sup>  | 51.82±1.67 <sup>a</sup>  | n.d                      | n.d                      | n.d                     | n.d                      | n.d                      | n.d                                    | n.d                      | n.d                      | n.d                       | n.d                      | n.d                      | n.d                      |
| HP                    | n.d                     | n.d                      | n.d                     | n.d                      | n.d                      | n.d                      | 21.83±0.89 <sup>c</sup>  | 19.23±0.77 <sup>ab</sup> | 18.76±0.8 <sup>a</sup>  | n.d                      | n.d                      | n.d                                    | n.d                      | n.d                      | n.d                       | n.d                      | n.d                      | n.d                      |
| AP                    | n.d                     | n.d                      | n.d                     | n.d                      | n.d                      | n.d                      | 16.87±0.89 <sup>c</sup>  | 11.77±0.85 <sup>ab</sup> | 10.13±1.1 <sup>a</sup>  | n.d                      | n.d                      | n.d                                    | n.d                      | n.d                      | n.d                       | n.d                      | n.d                      | n.d                      |
| LG2                   | n.d                     | n.d                      | n.d                     | n.d                      | n.d                      | n.d                      | 9.40±0.56 <sup>ab</sup>  | 8.81±0.45 <sup>a</sup>   | 8.98±0.23 <sup>a</sup>  | n.d                      | n.d                      | n.d                                    | n.d                      | n.d                      | n.d                       | n.d                      | n.d                      | n.d                      |
| LGRS                  | n.d                     | n.d                      | n.d                     | 62.04±1.23 <sup>c</sup>  | 55.33±0.99 <sup>b</sup>  | 53.02±1.35 <sup>a</sup>  | n.d                      | n.d                      | n.d                     | n.d                      | n.d                      | n.d                                    | n.d                      | n.d                      | n.d                       |                          |                          |                          |
| Hydroxycinnamic acids |                         |                          |                         |                          |                          |                          |                          |                          |                         |                          |                          |                                        |                          |                          |                           |                          |                          |                          |
| DIFQ                  | 22.44±1.09 <sup>c</sup> | 20.74±0.78 <sup>ab</sup> | 19.17±0.56 <sup>a</sup> | n.d                      | n.d                      | n.d                      | 12.90±0.23 <sup>b</sup>  | 11.99±0.56 <sup>a</sup>  | 11.22±0.8 <sup>a</sup>  | 32.13±0.78 <sup>b</sup>  | 31.09±0.59 <sup>a</sup>  | 30.70±1.01 <sup>a</sup>                | n.d                      | n.d                      | n.d                       | n.d                      | n.d                      | n.d                      |
| CHG                   | n.d                     | n.d                      | n.d                     | n.d                      | n.d                      | n.d                      | 17.22±0.49 <sup>ab</sup> | 16.99±0.44 <sup>a</sup>  | 16.27±0.7 <sup>a</sup>  | n.d                      | n.d                      | n.d                                    | n.d                      | n.d                      | n.d                       | n.d                      | n.d                      | n.d                      |
| RSM                   | n.d                     | n.d                      | n.d                     | n.d                      | n.d                      | n.d                      | 4.73±0.11 <sup>ab</sup>  | 4.21±0.67 <sup>a</sup>   | 3.91±0.55 <sup>a</sup>  | 9.32±0.34 <sup>b</sup>   | 7.01±0.11 <sup>a</sup>   | 7.98±0.22 <sup>a</sup>                 | 27.73±1.23 <sup>c</sup>  | 25.77±0.67 <sup>ab</sup> | 23.95±0.88 <sup>a</sup>   | n.d                      | n.d                      | n.d                      |
| CHA                   | n.d                     | n.d                      | n.d                     | n.d                      | n.d                      | n.d                      | n.d                      | n.d                      | n.d                     | n.d                      | n.d                      | n.d                                    | 17.42±0.55 <sup>ab</sup> | 16.99±0.78 <sup>a</sup>  | 16.53±0.88 <sup>a</sup>   | n.d                      | n.d                      | n.d                      |
| Phenolic terpene      |                         |                          |                         |                          |                          |                          |                          |                          |                         |                          |                          |                                        |                          |                          |                           |                          |                          |                          |
| CRN                   | n.d                     | n.d                      | n.d                     | 52.30±1.56 <sup>b</sup>  | 49.52±1.09 <sup>a</sup>  | 50.38±0.99 <sup>a</sup>  | 39.99±0.56 <sup>c</sup>  | 36.77±0.66 <sup>b</sup>  | 33.86±0.2 <sup>a</sup>  | n.d                      | n.d                      | n.d                                    | 30.89±0.33 <sup>b</sup>  | 31.53±0.55 <sup>bc</sup> | 27.91±0.59 <sup>a</sup>   | n.d                      | n.d                      | n.d                      |
| CAR                   | n.d                     | n.d                      | n.d                     | 67.59±0.64 <sup>a</sup>  | 77.11±0.84 <sup>b</sup>  | 88.82±0.87 <sup>c</sup>  | n.d                      | n.d                      | n.d                     | n.d                      | n.d                      | n.d                                    | n.d                      | n.d                      | n.d                       | n.d                      | n.d                      | n.d                      |
| phenolic acids        |                         |                          |                         |                          |                          |                          |                          |                          |                         |                          |                          |                                        |                          |                          |                           |                          |                          |                          |
| DHB                   | 37.84±1.23 <sup>c</sup> | 32.84±0.98 <sup>b</sup>  | 2946±0.88 <sup>a</sup>  | 9917±1.78 <sup>c</sup>   | 6703±1.23 <sup>b</sup>   | 54.08±0.99 <sup>a</sup>  | 49.27±0.34 <sup>c</sup>  | 35.09±1.65 <sup>b</sup>  | 19.35±1.9 <sup>a</sup>  | 41.18±1.02 <sup>c</sup>  | 37.09±1.86 <sup>b</sup>  | 24.04±0.77 <sup>a</sup>                | 71.337±0.6 <sup>c</sup>  | 55.73±0.62 <sup>a</sup>  | 58.25±0.27 <sup>b</sup>   | 18.93±0.29 <sup>a</sup>  | 37.67±1.77 <sup>b</sup>  | 42.37±0.89 <sup>c</sup>  |
| HB                    | 184.94±1.0 <sup>c</sup> | 181.08±1.0 <sup>b</sup>  | 174.83±1.0 <sup>c</sup> | 205.82±0.98 <sup>a</sup> | 241.09±0.65 <sup>b</sup> | 248.17±0.88 <sup>c</sup> | 201.06±0.67 <sup>a</sup> | 237.99±0.62 <sup>b</sup> | 261.2±0.85 <sup>c</sup> | 248.59±0.63 <sup>a</sup> | 255.94±0.38 <sup>b</sup> | 257.276±0.39 <sup>b</sup> <sup>c</sup> | 237.88±1.21 <sup>b</sup> | 231.88±0.99 <sup>a</sup> | 242.643±0.23 <sup>c</sup> | 184.47±0.78 <sup>a</sup> | 201.89±0.53 <sup>b</sup> | 223.52±0.49 <sup>c</sup> |
| Tyrosol               |                         |                          |                         |                          |                          |                          |                          |                          |                         |                          |                          |                                        |                          |                          |                           |                          |                          |                          |

|                      |     |     |     |                         |                          |                         |                        |                        |                        |                         |                        |                        |     |     |     |                          |                         |                         |
|----------------------|-----|-----|-----|-------------------------|--------------------------|-------------------------|------------------------|------------------------|------------------------|-------------------------|------------------------|------------------------|-----|-----|-----|--------------------------|-------------------------|-------------------------|
| HDT                  | n.d | n.d | n.d | 9.71±0.59 <sup>ab</sup> | 9.01±0.89 <sup>a</sup>   | 9.40±0.25 <sup>a</sup>  | n.d                    | n.d                    | n.d                    | n.d                     | n.d                    | n.d                    | n.d | n.d | n.d | n.d                      | n.d                     | n.d                     |
| TYR                  | n.d | n.d | n.d | 13.52±0.52 <sup>a</sup> | 14.82±0.77 <sup>ab</sup> | 15.85±0.59 <sup>b</sup> | n.d                    | n.d                    | n.d                    | n.d                     | n.d                    | n.d                    | n.d | n.d | n.d | n.d                      | n.d                     | n.d                     |
| OLEP                 | n.d | n.d | n.d | 43.79±0.69 <sup>c</sup> | 39.28±0.78 <sup>ab</sup> | 38.83±0.31 <sup>a</sup> | n.d                    | n.d                    | n.d                    | n.d                     | n.d                    | n.d                    | n.d | n.d | n.d | n.d                      | n.d                     | n.d                     |
| Lignans              |     |     |     |                         |                          |                         |                        |                        |                        |                         |                        |                        |     |     |     |                          |                         |                         |
| ISR                  | n.d | n.d | n.d | n.d                     | n.d                      | n.d                     | n.d                    | n.d                    | n.d                    | 8.58±0.92 <sup>ab</sup> | 7.54±0.83 <sup>a</sup> | 7.09±0.33 <sup>a</sup> | n.d | n.d | n.d | n.d                      | n.d                     | n.d                     |
| SES                  | n.d | n.d | n.d | n.d                     | n.d                      | n.d                     | n.d                    | n.d                    | n.d                    | n.d                     | n.d                    | n.d                    | n.d | n.d | n.d | 27.91±0.63 <sup>a</sup>  | 27.32±0.72 <sup>a</sup> | 27.44±0.27 <sup>a</sup> |
| Hydroxyphenylpropene |     |     |     |                         |                          |                         |                        |                        |                        |                         |                        |                        |     |     |     |                          |                         |                         |
| PRD                  |     | n.d | n.d | n.d                     | n.d                      | n.d                     | n.d                    | n.d                    | n.d                    | n.d                     | n.d                    | n.d                    | n.d | n.d | n.d | 36.83±1.23 <sup>ab</sup> | 35.03±0.51 <sup>a</sup> | 34.22±1.04 <sup>a</sup> |
| GNG                  |     | n.d | n.d | n.d                     | n.d                      | n.d                     | n.d                    | n.d                    | n.d                    | n.d                     | n.d                    | n.d                    | n.d | n.d | n.d | 23.15±0.79 <sup>ab</sup> | 22.00±0.99 <sup>a</sup> | 22.83±0.76 <sup>a</sup> |
| Hydroxybenzaldehyde  |     |     |     |                         |                          |                         |                        |                        |                        |                         |                        |                        |     |     |     |                          |                         |                         |
| VAN                  |     | n.d | n.d | n.d                     | n.d                      | n.d                     | 4.77±0.39 <sup>a</sup> | 4.56±0.88 <sup>a</sup> | 4.33±0.91 <sup>a</sup> | n.d                     | n.d                    | n.d                    | n.d | n.d | n.d | n.d                      | n.d                     | n.d                     |

Hydroxy-Luteolin-glucoside – HLG; Nepetrin: NP; Luteolin-glucuronide -LG; Plantaginin: PL; Luteolin-acetyl-glucuronide: LAG; Luteolin-glucoside: LA; Cirsimaritin: CRM; Homoplantaginin (Hispidulin-glucoside): HP; Apigenin-glucoside: AP; Luteolin-glucoside2:LG2; Luteolin-glucuronide (Rosemaryic acid): LGRS; Dicaffeoylquinic acid: DIFQ; Chlorogenic acid: CHG; Rosemaryic acid-RSM; Chicoric acid: CHA; Carnosol: CRN; Carnosic acid: CAR; Dihydroxybenzoic acid: DHB; Hydroxybenzoic acid: HB; Hydroxytyrosol: HDT; Tyrosol: TYR; Oleuropein derivative: OLEP; Isolariciresinol: ISR; Sesamin: SES; Paradol: PRD; Gingerol: GNG; Vanilin: VAN

Mean values of three different determinations followed by standard deviation; M<sub>1</sub> – sirloin marinated only with salt and pepper; M<sub>2</sub> – sirloin marinated with olive oil, rosemary, salt and pepper; M<sub>3</sub> – sirloin marinated with pumpkin oil, oregano, salt and pepper; M<sub>4</sub> – sirloin marinated with sunflower oil, thyme, salt and pepper; M<sub>5</sub>-sirloin marinated with walnut oil, basil, salt and pepper; M<sub>6</sub>-sirloin marinated with sesame oil, ginger, salt and pepper; Values not sharing the same small letter in a row indicate significant difference between the same sample at different moments: 24h, 72, 120h; n.d.–not detected

Table S3:Phenolics profile of cooked samples

| Compound<br>s µg/g           | M <sub>1</sub> T<br>24h    | M <sub>1</sub> T<br>72h | M <sub>1</sub> T<br>120h | M <sub>2</sub> T<br>24h             | M <sub>2</sub> T<br>72h               | M <sub>2</sub> T<br>120h | M <sub>3</sub> T<br>24h | M <sub>3</sub> T<br>72h | M <sub>3</sub> T<br>120h | M <sub>4</sub> T<br>24h  | M <sub>4</sub> T<br>72h  | M <sub>4</sub> T<br>120h | M <sub>5</sub> T<br>24h  | M <sub>5</sub> T<br>72h  | M <sub>6</sub> T<br>120h | M <sub>6</sub> T<br>24h  | M <sub>6</sub> T<br>72h  | M <sub>6</sub> T<br>120h |
|------------------------------|----------------------------|-------------------------|--------------------------|-------------------------------------|---------------------------------------|--------------------------|-------------------------|-------------------------|--------------------------|--------------------------|--------------------------|--------------------------|--------------------------|--------------------------|--------------------------|--------------------------|--------------------------|--------------------------|
| <i>Flavonoes</i>             |                            |                         |                          |                                     |                                       |                          |                         |                         |                          |                          |                          |                          |                          |                          |                          |                          |                          |                          |
| HLG                          | n.d.                       | n.d.                    | n.d.                     | 3.48±0.23 <sup>a</sup>              | 4.03±0.38 <sup>ab</sup>               | 5.08±0.43 <sup>c</sup>   | n.d.                    | n.d.                    | n.d.                     | n.d.                     | n.d.                     | n.d.                     | n.d.                     | n.d.                     | n.d.                     | n.d.                     | n.d.                     | n.d.                     |
| NP                           | n.d.                       | n.d.                    | n.d.                     | 14.25±0.47 <sup>a</sup>             | 15.78±0.76 <sup>b</sup>               | 17.88±0.88 <sup>c</sup>  | n.d.                    | n.d.                    | n.d.                     | n.d.                     | n.d.                     | n.d.                     | n.d.                     | n.d.                     | n.d.                     | n.d.                     | n.d.                     | n.d.                     |
| LG                           | n.d.                       | n.d.                    | n.d.                     | n.d.                                | n.d.                                  | n.d.                     | 20.72±0.22 <sup>a</sup> | 24.43±0.67 <sup>b</sup> | 27.99±0.33 <sup>c</sup>  | 19.02±0.87 <sup>a</sup>  | 19.76±0.56 <sup>a</sup>  | 19.6±0.45 <sup>a</sup>   |                          |                          |                          | n.d.                     | n.d.                     | n.d.                     |
| PL                           | n.d.                       | n.d.                    | n.d.                     | 11.93±0.77 <sup>a</sup>             | 12.1±0.36 <sup>ab</sup>               | 13.21±0.65 <sup>b</sup>  | n.d.                    | n.d.                    | n.d.                     | n.d.                     | n.d.                     | n.d.                     | n.d.                     | n.d.                     | n.d.                     | n.d.                     | n.d.                     | n.d.                     |
| LAG                          | n.d.                       | n.d.                    | n.d.                     | 7.75±0.12a                          | 7.02±0.34 <sup>ab</sup>               | 6.61±0.54 <sup>a</sup>   | n.d.                    | n.d.                    | n.d.                     | n.d.                     | n.d.                     | n.d.                     | n.d.                     | n.d.                     | n.d.                     | n.d.                     | n.d.                     | n.d.                     |
| LA                           | n.d.                       | n.d.                    | n.d.                     | n.d.                                | n.d.                                  | n.d.                     | 5.54±0.31 <sup>a</sup>  | 5.04±0.55 <sup>a</sup>  | 5.93±0.03 <sup>a</sup>   | 10.34±0.49 <sup>a</sup>  | 10.89±0.67 <sup>a</sup>  | 11.02±0.88 <sup>a</sup>  | n.d.                     | n.d.                     | n.d.                     | n.d.                     | n.d.                     | n.d.                     |
| CRM                          | n.d.                       | n.d.                    | n.d.                     | 27.38±0.7 <sup>a</sup>              | 34.23±0.67 <sup>b</sup>               | 39.872±0.77 <sup>c</sup> | n.d.                    | n.d.                    | n.d.                     | n.d.                     | n.d.                     | n.d.                     | n.d.                     | n.d.                     | n.d.                     | n.d.                     | n.d.                     | n.d.                     |
| HP                           | n.d.                       | n.d.                    | n.d.                     | n.d.                                | n.d.                                  | n.d.                     | 17.94±1.0 <sup>c</sup>  | 12.5±0.2 <sup>ab</sup>  | 11.56±0.05 <sup>a</sup>  | n.d.                     |
| AP                           | n.d.                       | n.d.                    | n.d.                     | n.d.                                | n.d.                                  | n.d.                     | 13.69±0.8 <sup>a</sup>  | 13.99±0.2 <sup>a</sup>  | 14.5±0.55 <sup>ab</sup>  | n.d.                     |
| LG2                          | n.d.                       | n.d.                    | n.d.                     | n.d.                                | n.d.                                  | n.d.                     | 8.56±0.03 <sup>a</sup>  | 7.55±0.46 <sup>a</sup>  | 8.66±0.55 <sup>a</sup>   | n.d.                     |
| <i>Hydroxycinnamic acids</i> |                            |                         |                          |                                     |                                       |                          |                         |                         |                          |                          |                          |                          |                          |                          |                          |                          |                          |                          |
| DIFQ                         | 18.5±0.2 <sup>a</sup>      | 18.02±0.4 <sup>a</sup>  | 17.92±0.5 <sup>a</sup>   | n.d.                                | n.d.                                  | n.d.                     | 11.22±0.3 <sup>a</sup>  | 10.22±0.4 <sup>a</sup>  | 10.33±0.1 <sup>a</sup>   | 20.01±0.89 <sup>a</sup>  | 19.88±0.44 <sup>a</sup>  | 20.07±0.31 <sup>a</sup>  | n.d.                     | n.d.                     | n.d.                     | n.d.                     | n.d.                     | n.d.                     |
| CHG                          | n.d.                       | n.d.                    | n.d.                     | n.d.                                | n.d.                                  | n.d.                     | 15.00±0.3 <sup>a</sup>  | 15.01±0.2 <sup>a</sup>  | 14.49±0.56 <sup>a</sup>  | n.d.                     |
| RSM                          | n.d.                       | n.d.                    | n.d.                     | 24.45±0.7 <sup>a</sup>              | 27.09±0.89 <sup>b</sup>               | 29.62±0.33 <sup>c</sup>  | 4.26±0.12 <sup>c</sup>  | 3.99±0.2 <sup>ab</sup>  | 3.04±0.10 <sup>a</sup>   | 4.34±0.23 <sup>a</sup>   | 4.09±0.12 <sup>a</sup>   | 5.08±0.23 <sup>ab</sup>  | 23.95±0.67 <sup>a</sup>  | 23.00±0.78 <sup>a</sup>  | 24.16±0.6 <sup>ab</sup>  | n.d.                     | n.d.                     | n.d.                     |
| CHA                          | n.d.                       | n.d.                    | n.d.                     | n.d.                                | n.d.                                  | n.d.                     | n.d.                    | n.d.                    | n.d.                     | n.d.                     | n.d.                     | n.d.                     | 16.44±0.88 <sup>b</sup>  | 15.23±0.2 <sup>ab</sup>  | 14.76±0.55 <sup>a</sup>  | n.d.                     | n.d.                     | n.d.                     |
| <i>Phenolic terpene</i>      |                            |                         |                          |                                     |                                       |                          |                         |                         |                          |                          |                          |                          |                          |                          |                          |                          |                          |                          |
| CRN                          | n.d.                       | n.d.                    | n.d.                     | 35.9±0.88 <sup>a</sup> <sub>b</sub> | 34.99±0.34 <sup>a</sup>               | 35.56±0.65 <sup>a</sup>  | 21.61±0.33 <sup>a</sup> | 21.06±0.56 <sup>a</sup> | 21.09±0.33 <sup>a</sup>  | 26.13±0.55               | n.d.                     | n.d.                     | 26.13±0.35 <sup>a</sup>  | 25.21±0.83 <sup>a</sup>  | 25.52±0.67 <sup>a</sup>  | n.d.                     | n.d.                     | n.d.                     |
| CAR                          | n.d.                       | n.d.                    | n.d.                     | 67.05±0.89 <sup>a</sup>             | 67.33±0.56 <sup>a</sup>               | 66.92±0.44 <sup>a</sup>  | n.d.                    | n.d.                    | n.d.                     | n.d.                     | n.d.                     | n.d.                     | n.d.                     | n.d.                     | n.d.                     | n.d.                     | n.d.                     | n.d.                     |
| <i>phenolic acids</i>        |                            |                         |                          |                                     |                                       |                          |                         |                         |                          |                          |                          |                          |                          |                          |                          |                          |                          |                          |
| DHB                          | 66.1<br>±1.12 <sup>c</sup> | 48.23±0.87 <sup>b</sup> | 28.15±1.34 <sup>a</sup>  | 132.7±0.19 <sup>c</sup>             | 89.45±0.88 <sup>b</sup>               | 75.08±0.67 <sup>a</sup>  | 15.29±0.76 <sup>a</sup> | 17.92±1.56 <sup>b</sup> | 19.11±0.45 <sup>c</sup>  | 32.92±1.2 <sup>ab</sup>  | 27.09±0.89 <sup>a</sup>  | 27.91±0.22 <sup>a</sup>  | 49.92±0.34 <sup>c</sup>  | 43.09±0.11 <sup>b</sup>  | 40.70±0.31 <sup>a</sup>  | 38.62±0.77 <sup>a</sup>  | 45.98±0.81 <sup>b</sup>  | 59.96±0.47 <sup>c</sup>  |
| HB                           | 196.1±0.7 <sup>a</sup>     | 199.53±0.2 <sup>b</sup> | 210.97±0.4 <sup>c</sup>  | 252.99±0.5 <sup>a</sup>             | 255.09±0.89 <sup>a</sup> <sup>b</sup> | 262.57±0.7± <sup>c</sup> | 255.68±0.6 <sup>a</sup> | 267.09±0.3 <sup>b</sup> | 285.47±0.5 <sup>6c</sup> | 293.43±0.7 <sup>5c</sup> | 290.99±1.22 <sup>b</sup> | 272.38±1.0 <sup>9a</sup> | 266.43±1.43 <sup>b</sup> | 260.00±0.5 <sup>6a</sup> | 261.91±0.8 <sup>9a</sup> | 250.79±0.7 <sup>8a</sup> | 273.21±0.54 <sup>b</sup> | 292.54±0.9 <sup>2c</sup> |
| <i>Tyrosol</i>               |                            |                         |                          |                                     |                                       |                          |                         |                         |                          |                          |                          |                          |                          |                          |                          |                          |                          |                          |
| HDT                          | n.d.                       | n.d.                    | n.d.                     | 13.34±0.2 <sup>c</sup>              | 10.22±0.45 <sup>b</sup>               | 7.87±0.33 <sup>a</sup>   | n.d.                    | n.d.                    | n.d.                     | n.d.                     | n.d.                     | n.d.                     | n.d.                     | n.d.                     | n.d.                     | n.d.                     | n.d.                     | n.d.                     |
| TYR                          | n.d.                       | n.d.                    | n.d.                     | 5.67±0.23 <sup>a</sup>              | 6.66±0.76 <sup>ab</sup>               | 7.69±0.39 <sup>c</sup>   | n.d.                    | n.d.                    | n.d.                     | n.d.                     | n.d.                     | n.d.                     | n.d.                     | n.d.                     | n.d.                     | n.d.                     | n.d.                     | n.d.                     |
| OLEP                         | n.d.                       | n.d.                    | n.d.                     | 28.63±0.3 <sup>c</sup>              | 25.09±0.78 <sup>b</sup>               | 17.38±0.34 <sup>a</sup>  | n.d.                    | n.d.                    | n.d.                     | n.d.                     | n.d.                     | n.d.                     | n.d.                     | n.d.                     | n.d.                     | n.d.                     | n.d.                     | n.d.                     |
| <i>Lignans</i>               |                            |                         |                          |                                     |                                       |                          |                         |                         |                          |                          |                          |                          |                          |                          |                          |                          |                          |                          |
| ISR                          | n.d.                       | n.d.                    | n.d.                     | n.d.                                | n.d.                                  | n.d.                     | n.d.                    | n.d.                    | n.d.                     | 3.01±0.45 <sup>b</sup>   | 3.09±0.22 <sup>ab</sup>  | 2.93±0.31 <sup>a</sup>   | n.d.                     | n.d.                     | n.d.                     | n.d.                     | n.d.                     | n.d.                     |
| SES                          | n.d.                       | n.d.                    | n.d.                     | n.d.                                | n.d.                                  | n.d.                     | n.d.                    | n.d.                    | n.d.                     | n.d.                     | n.d.                     | n.d.                     | n.d.                     | n.d.                     | n.d.                     | 19.15±0.23 <sup>a</sup>  | 19.05±0.11 <sup>a</sup>  | 19.31±0.21 <sup>a</sup>  |
| <i>Hydroxyphenylpropene</i>  |                            |                         |                          |                                     |                                       |                          |                         |                         |                          |                          |                          |                          |                          |                          |                          |                          |                          |                          |
| PRD                          | n.d.                       | n.d.                    | n.d.                     | n.d.                                | n.d.                                  | n.d.                     | n.d.                    | n.d.                    | n.d.                     | n.d.                     | n.d.                     | n.d.                     | n.d.                     | n.d.                     | n.d.                     | 20.71±0.34 <sup>a</sup>  | 19.09±0.21 <sup>a</sup>  | 19.99±0.11 <sup>a</sup>  |
| GNG                          | n.d.                       | n.d.                    | n.d.                     | n.d.                                | n.d.                                  | n.d.                     | n.d.                    | n.d.                    | n.d.                     | n.d.                     | n.d.                     | n.d.                     | n.d.                     | n.d.                     | n.d.                     | 13.521±0.3 <sup>a</sup>  | 12.04±0.45 <sup>a</sup>  | 13.261±0.7 <sup>a</sup>  |
| <i>Hydroxybenzaldehyde</i>   |                            |                         |                          |                                     |                                       |                          |                         |                         |                          |                          |                          |                          |                          |                          |                          |                          |                          |                          |
| VAN                          | n.d.                       | n.d.                    | n.d.                     | n.d.                                | n.d.                                  | n.d.                     | n.d.                    | n.d.                    | n.d.                     | 2.45±0.56 <sup>a</sup>   | 2.33±0.33 <sup>a</sup>   | 2.66±0.41 <sup>a</sup>   | n.d.                     | n.d.                     | n.d.                     | n.d.                     | n.d.                     | n.d.                     |

Hydroxy-Luteolin-glucoside – HLG; Nepetrin: NP; Luteolin-glucuronide -LG; Plantagin: PL; Luteolin-acetyl-glucuronide: LAG; Luteolin-glucoside: LA; Cirsimaritin: CRM; Homoplantagin (Hispidulin-glucoside): HP; Apigenin-glucoside: AP; Luteolin-glucoside2:LG2; Luteolin-glucuronide (Rosemaryic acid): LGRS; Dicafeoylquinic acid: DIFQ; Chlorogenic acid: CHG; Rosemaryic acid-RSM; Chicoric acid: CHA; Carnosol: CRN; Carnosic acid: CAR; Dihydroxybenzoic acid: DHB; Hydroxybenzoic acid: HB; Hydroxytyrosol: HDT; Tyrosol: TYR; Oleoropein derivative: OLEP; Isolariciresinol: ISR; Sesamin: SES; Paradol: PRD; Gingerol: GNG; Vanilin: VAN; Mean values of three different determinations followed by standard deviation; M<sub>1</sub>T – cooked sirloin marinated only with salt and pepper; M<sub>2</sub>T – cooked sirloin marinated with olive oil, rosemary, salt and pepper; M<sub>3</sub>T – cooked sirloin marinated with pumpkin oil, oregano, salt and pepper; M<sub>4</sub>T – cooked sirloin marinated with sunflower oil, thyme, salt and pepper; M<sub>5</sub>-sirloin marinated with walnut oil, basil, salt and pepper; M<sub>6</sub>-sirloin marinated with sesame oil, ginger, salt and pepper; Values not sharing the same small letter in a row indicate significant difference between the same sample at different moments: 24h, 72h, 120h; n.d.–not detected.
